1                   **Cognition, physical function, and life purpose in the rural elderly**  
2                   **population: a systematic review protocol**

3  
4   Hércules Lázaro Morais Campos<sup>1</sup>; Elisa Brosina De Leon<sup>2</sup>; Ingrid Merllin Batista  
5   de Souza<sup>3</sup>; Anna Quialheiro<sup>4</sup>; Elizabete Regina Araújo de Oliveira<sup>5</sup>

6   1 Professor at the Physiotherapy Department of the Federal University of  
7   Amazonas/ Institute of Health and Biotechnology (UFAM/ISB). 2 PhD student in  
8   Collective Health at the Department of Collective Health at the Federal University  
9   of Espírito Santo (UFES).

10   2 Professor at the Universidade Federal do Amazonas, Stricto Sensu Post-  
11   graduation Program in Human Movement Sciences, Faculdade de Educação  
12   Física e Fisioterapia, Manaus, Amazonas, Brazil.

13   3 Department of Physical Therapy, Speech-Language Pathology, and Audiology  
14   and Occupational Therapy, Faculty of Medicine at University of São Paulo,  
15   Cipotânea Street, Vila Universitária, 51, São Paulo 05360-000, SP, Brazil; e-  
16   mail:[ingredmerllin@usp.br](mailto:ingredmerllin@usp.br)

17   4 Health and Human Movement Unit, Polytechnic Institute of Health of the North  
18   - CESPUP, Portugal.

19   5 Professor of the Post-graduate Program in Collective Health of the Federal  
20   University of Espírito Santo.

21  
22   **Abstract**

23  
24   **Introduction:** Aging in the rural setting world from the perspective of cognition,  
25   physical function, and life purpose, essential constructs for a prosperous old age,  
26   still needs to be better discussed. Thus, this systematic review protocol highlights  
27   the prevalence of cognitive decline, physical functioning, and life purpose in older  
28   adults aging in rural community settings. Methods and analysis: We will include  
29   cross-sectional studies published until April 2022 found in 8 databases: Embase,

NOTE: This preprint reports new research that has not been certified by peer review and should not be used to guide clinical practice.

30 MEDLINE, LILACS, PsycINFO, Scopus, SciELO, and Web of Science. For the  
31 first selection of studies, the Ryyan software will be used, and to check the  
32 methodological quality and the risk of bias, we will use COSMIN. For the primary  
33 analysis, the titles and abstracts available in the search engine will be analyzed  
34 by the following MeSH descriptors "Physical functioning,"; "Cognition,";  
35 "Cognitive function,"; "Life purpose,"; Personal satisfaction; Subjective well-  
36 being; "Elderly"; "Older"; "Rural aging"; "Rural population"; "Communities, rural";  
37 "Distribution, rural spatial"; "Medium communities"; "Rural settlement"; "Small  
38 community". If necessary, the secondary analysis will adopt a complete reading  
39 of the selected articles by two blinded reviewers and confirmed by a third person.  
40 Publication bias will be assessed using cross-sectional analytical study quality.  
41 Sensitivity analyses will be performed by retrieving one article at a time and  
42 analyzing their endpoints with the proposal to identify the manuscripts that  
43 significantly influenced the combined prevalence of the endpoints.

44

#### 45 **Strengths and limitations of this study:**

46 It will present worldwide epidemiological data on aging in rural settings from the  
47 perspective of cognition, physical functioning, and life purpose.

48 It is the first systematic review that involves the theme of life purpose worldwide  
49 in rural elderly.

50 It is a cross-sectional study that although it cannot describe clinical outcomes,  
51 presents sociodemographic, cognition, physical functioning, and life purpose data  
52 that can help in public health decision-making for this population.

53

#### 54 **INTRODUCTION**

55

56 Aging within the rural context takes place in a variety of ways around the world,  
57 and increasingly the literature has pointed out that people aging in this unique  
58 setting have different epidemiological and health indicators than seniors aging in  
59 the urban context (1)

60 There are controversies about the elderly aging in the rural context, sometimes  
61 the challenges are pointed as independence and active participation in  
62 community life, as well as attention to safety, choice, and location of housing,  
63 loneliness, social isolation, difficulty accessing services, leisure, food,

64 transportation, agriculture itself until retirement. On the other hand, seniors who  
65 age in rural settings may have good health, and quality of life especially in the  
66 cognitive(1) aspect, and have better access to health, services, and healthier  
67 living and eating habits although they are at constant risk of frailty (2)

68 Well-conducted cross-sectional and observational studies have relevance within  
69 aging and measure the prevalence of health outcomes as well as help understand  
70 the social determinants of health and above all describe the characteristics of a  
71 given population (3)

72 There is still no synthesis of what aging in the rural world context looks like from  
73 the perspective of cognition, physical function, and life purpose. Thus, this  
74 systematic review protocol was designed with the following question: (1) what is  
75 the prevalence of cognition, physical functioning, and life purpose in older adults  
76 aging in rural community settings?

77

## 78 **METHODS AND ANALYSIS**

79

80 This systematic review protocol followed the PICO strategy and was registered  
81 with the International prospective register of systematic reviews (PROSPERO)  
82 under number 2022 CRD42022311053.

83

### 84 **Eligibility Criteria**

85

#### 86 **Databases and Search Strategy**

87

88 The search will include cross-sectional studies until April/2022 in journals indexed  
89 in the following health databases: Embase, Medical Literature Analysis and  
90 Retrieval System Online (MEDLINE), Latin American and Caribbean Literature in  
91 Health Sciences (LILACS), PsycINFO, SciVerse Scopus (Scopus), SciELO  
92 (Scientific Electronic Library Online) and Web of Science. Published until  
93 December 2021, studies that epidemiologically evaluated the outcomes of  
94 cognition, functionality, and life purpose within rural aging and that were  
95 published in Portuguese, English or Spanish will be accepted. The protocol will  
96 follow the Preferred Reporting Items for Systematic Reviews (PRISMA)  
97 guidelines (4)

98 The search methods will use 3-step Boolean operators with the search strategies  
99 following the uniqueness of each database. The search strategy will use: "rural  
100 aging", "elderly", "old", "elderly", "physical functioning", "cognition", and "life  
101 purpose" according to Boolean operators. Two independent HLMC and EBDL  
102 reviewers will search the studies, and if necessary, a third reviewer will be  
103 included to decide on tie-breaking criteria.

104

### 105 **Study selection and data extraction**

106

107 After evaluation of the titles and abstracts retrieved from the searches, potential  
108 full texts will be assessed for eligibility by two independent reviewers. Authors of  
109 potential full texts will be contacted for questions about the eligibility criteria and  
110 studies will be excluded when there is no response. Studies meeting the eligibility  
111 criteria will be included. For studies with the same sample, only those with the  
112 most representative sample of that population will be considered.

113 Data relevant to the theme in question will be extracted from the selected articles.  
114 The selection of articles will contemplate the following eligibility criteria: (a)  
115 inclusion criteria: studies that presented a prevalence of functioning conditions,  
116 cognitive decline, and life purpose in rural elderly; and (b) exclusion criteria:  
117 systematic review studies; methodological studies; instrument validation studies;  
118 and qualitative studies. The following information will be recorded: year of  
119 publication of the study, authors, characteristics of the institutions in which the  
120 study was conducted, sampling strategy, type of sample, prevalence of  
121 outcomes, and their associated factors. The information will be organized and  
122 presented in tables.

123

### 124 **Study Evaluation**

125

126 To assess the methodological quality of each study, i.e., to assess the risk of  
127 bias in a study's results, the corresponding COSMIN Risk of Bias box must be  
128 filled in. To determine the overall quality of a study, the lowest rating of any  
129 standard in the box is taken (i.e. the "worst score counts" principle). For  
130 example, if for a reliability study, one item in a box is rated as 'inadequate', the

131 overall methodological quality of that reliability study is rated as 'inadequate'  
132 which will generate a quality score at the end of the systematic review (5).

133

134

### 135 **Strategy for Data Overview**

136

137 The synthesis of outcome study data will be organized and presented according  
138 to the recommendations of the Meta-analysis of Observational Studies in  
139 Epidemiology (MOOSE) statement (6). When two or more articles are reported  
140 as results from the outcome database, only the most comprehensive one (with  
141 more details on sampling strategy and response rate) will be included in the meta-  
142 analysis. Results will be presented in Forest Plots, showing 95% confidence  
143 intervals and p-values. Heterogeneity will be assessed using the  $I^2$  statistic, which  
144 will be considered high when  $I^2$  is equal to or greater than 75%. Statistical  
145 procedures will be performed in STATA 14.0, with the significance level set at 5%  
146 for two-tailed tests (6).

147

148

### 149 **Patient and Public Involvement**

150

151 There is no direct patient or public involvement in this study.

152

153

### 154 **ETHICS AND DISSEMINATION**

155

156 Ethical approval is not required for this study since no personal or private  
157 information of the individuals will be involved. It is intended to submit this study  
158 to a peer-reviewed academic journal.

159 Cross-sectional studies are more economically feasible but easy to conduct and  
160 can establish preliminary evidence so that further advanced studies can be  
161 conducted. Prevalence and incidence are established and can generate  
162 important hypotheses, they can be analytical or descriptive, and depending on

163 whether the outcome variable is assessed possible associations with exposures  
164 or risk factors can be established (3).

165 It seems that the functional physical capacity of elderly people aging in rural  
166 settings needs to be better understood, elderly women with good income are  
167 more likely to be sedentary as well as elderly men (7).

168 Studies have demonstrated the factors associated with frailty in rural elderly such  
169 as age, gender, health status variables and that included self-perception of health  
170 and number of chronic conditions, functional covariates variables such as  
171 disability in basic activities of daily living (ABVD), disability in instrumental ADLs,  
172 length of stay in the chair and psychosocial problems, it seems that depressive  
173 symptoms and cognitive impairment, greater comorbidity and disability was found  
174 in this population (8).

175 As for cognition, there is divergence in the literature related to the place of birth  
176 and where the rural elderly live. Sometimes the rural environment is pointed out  
177 as positive for aging (2) and at other times not (9) and (10).

178 The Purpose of Life in rural elderly is still little investigated and very little is known  
179 about the impact of this condition on rural aging until this moment the literature  
180 points out that the elderly with a purpose of life are more resilient, have less risk  
181 for developing dementia, feel less pain and are happier and more functional (11).

182 There are many questions to be answered about the way of aging in the rural  
183 context and some gaps still need to be filled and understood to understand rural  
184 elder aging. After all, is rural aging positive or negative on the cognition, physical  
185 function, and life purpose of the elderly population?

186

### 187 **Contributions:**

188

189 HLMC- Writing the review protocol, reviewing the search strategies, recording the  
190 review, writing the manuscript, and final revision of the manuscript.

191 EBDL- Writing of the review protocol, review of the search strategies, and final  
192 revision of the manuscript.

193 IMBS- Writing of the review protocol, review of the search strategies and final  
194 revision of the manuscript.

195

196 AQ- Writing of the review protocol, review of the search strategies and final review  
197 of the manuscript.

198 ERAO- Writing of the review protocol, review of the search strategies and final  
199 review of the manuscript.

200

## 201 **Funding Statement**

202 Research scholarship from the Amazonas State Research Support Foundation  
203 - Brazil (FAPEAM).

204

205

206

## 207 **Competing Interest Statement**

208 No competing interest.

209

210

## 211 **REFERENCES**

212 1. Winterton R BM. A decade of rural ageing research in the Australasian Journal  
213 on Ageing. 2020 [cited 2023 Jan 14]; Available from:  
214 <https://onlinelibrary.wiley.com/doi/10.1111/ajag.12879>

215 2. Garbaccio JL, Tonaco LAB, Estêvão WG, Barcelos BJ. Aging and quality of  
216 life of elderly people in rural areas. Rev Bras Enferm [Internet]. 2018 [cited 2023  
217 Jan 14];71:724–32. Available from:  
218 <http://www.scielo.br/j/reben/a/pC3sjdGyJnPbyC9PXygQRrF/abstract/?lang=en>

219 3. Wang X, Cheng Z. Cross-Sectional Studies: Strengths, Weaknesses, and  
220 Recommendations. Chest [Internet]. 2020 Jul 1 [cited 2023 Jan  
221 14];158(1S):S65–71. Available from: <https://pubmed.ncbi.nlm.nih.gov/32658654/>

222 4. Page MJ, McKenzie JE, Bossuyt PM, Boutron I, Hoffmann TC, Mulrow CD, et  
223 al. The PRISMA 2020 statement: an updated guideline for reporting systematic  
224 reviews. BMJ [Internet]. 2021 Mar 29 [cited 2023 Jan 14];372. Available from:  
225 <https://pubmed.ncbi.nlm.nih.gov/33782057/>

226 5. Cosmin. Systematic reviews of measurement properties. 2017. 6. DF Stroup 1  
227 JBSMEOGWDRDMBJBTSST. Metanálise de estudos observacionais em

- 228 epidemiologia: uma proposta de relato. Grupo de meta-análise de estudos  
229 observacionais em epidemiologia (MOOSE). JAMA. 2000;283(15):2008–12.
- 230 7. Ethisan P, Somrongthong R, Ahmed J, Kumar R, Chapman RS. Factors  
231 Related to Physical Activity Among the Elderly Population in Rural Thailand. J  
232 Prim Care Community Health [Internet]. 2017 Apr 1 [cited 2023 Jan 14];8(2):71–  
233 6. Available from: <https://pubmed.ncbi.nlm.nih.gov/27799413/>
- 234 8. Curcio CL, Henao GM, Gomez F. Frailty among rural elderly adults. BMC  
235 Geriatr [Internet]. 2014 Jan 10 [cited 2023 Jan 14];14(1). Available from:  
236 <https://pubmed.ncbi.nlm.nih.gov/24405584/> 9. Silva JNMA da, Leite MT,  
237 Gaviraghi LC, Kirsten VR, Kinalski S da S, Hildebrandt LM, et al. Predicting  
238 dimensions of clinical-functional conditions and cognition in the elderly. Rev Bras  
239 Enferm [Internet]. 2020 Jul 13 [cited 2023 Jan 15];73:e20190162. Available from:  
240 <http://www.scielo.br/j/reben/a/YdR9HPnBdgDXPR6wgKCZY5m/?lang=en>
- 241 10. Jing Z, Li J, Wang Y, Ding L, Tang X, Feng Y, et al. The mediating effect of  
242 psychological distress on cognitive function and physical frailty among the  
243 elderly: Evidence from rural Shandong, China. J Affect Disord [Internet]. 2020  
244 May 1 [cited 2023 Jan 14];268:88–94. Available from:  
245 <https://pubmed.ncbi.nlm.nih.gov/32158011/>
- 246 11. Cristina Cristóvão Ribeiro MSYALNeri. Propósito de vida na vida adulta e na  
247 terceira idade: revisão integrativa. Cien Saude Colet. 2020;25(6):2127–42.
- 248
- 249
